# Supplementary material for: Larger pores and higher Tc: {[Ni(cyclam)]3[W(CN)8]2·solv}n – a new member of the largest family of pseudo-polymorphic isomers among octacyanometallate-based assemblies
Source: Royal Society of Chemistry journal article supplement (doi:10.1039/c5ce00287g), 2015-01-01
Supplement: c5ce00287g1.pdf [file c5ce00287g1.pdf]

## Supporting Information for

### Larger pores and higher $T_c$ : $\{[\text{Ni}(\text{cyclam})]_3[\text{W}(\text{CN})_8]_2 \cdot \text{solv}\}_n$ - a new member of the largest family of pseudo-polymorphic isomers among octacyanomethylate-based assemblies

Beata Nowicka,<sup>\*a</sup> Mateusz Reczyński,<sup>a</sup> Michał Rams,<sup>b</sup> Wojciech Nitek,<sup>a</sup> Marcin Koziel<sup>a</sup> and Barbara Sieklucka<sup>a</sup>

<sup>a</sup>Faculty of Chemistry, Jagiellonian University, Ingardena 3, 30-060 Kraków, Poland

<sup>b</sup>Institute of Physics, Jagiellonian University, Łojasiewicza 11, 30-348 Kraków, Poland

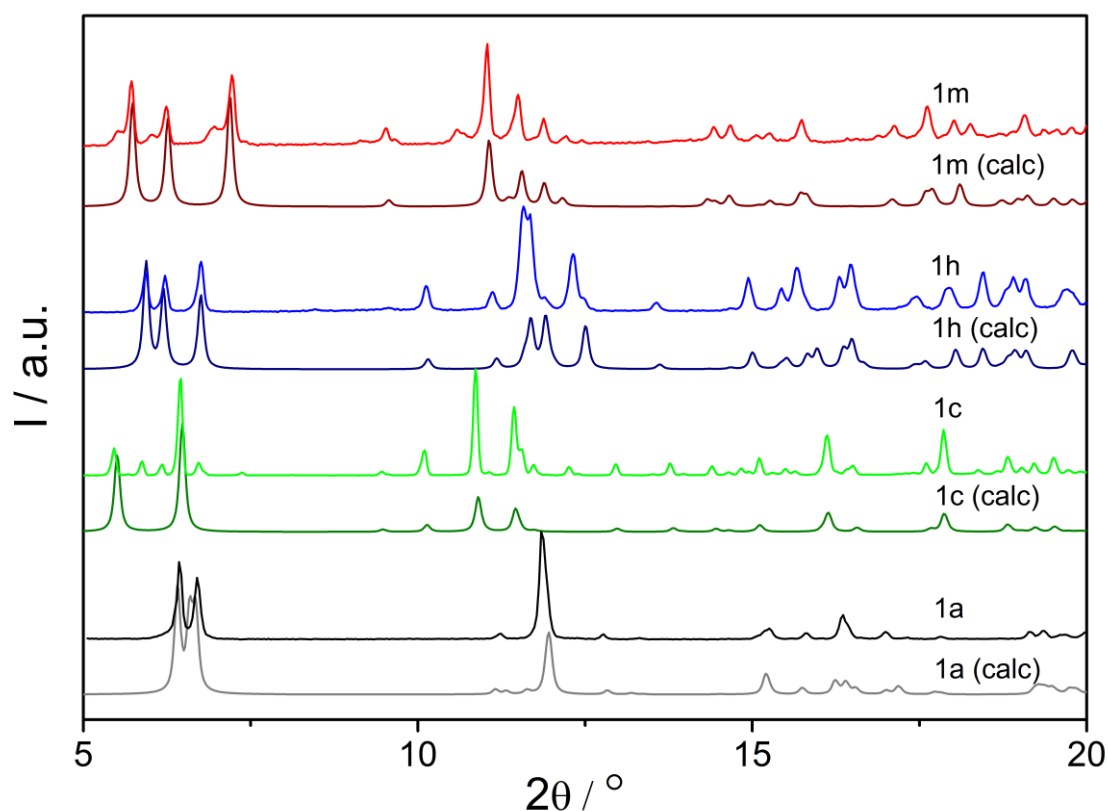

**Fig. S1.** Powder XRD patterns for different pseudo-polymorphs of **1** in comparison to the patterns calculated from single crystal measurements.

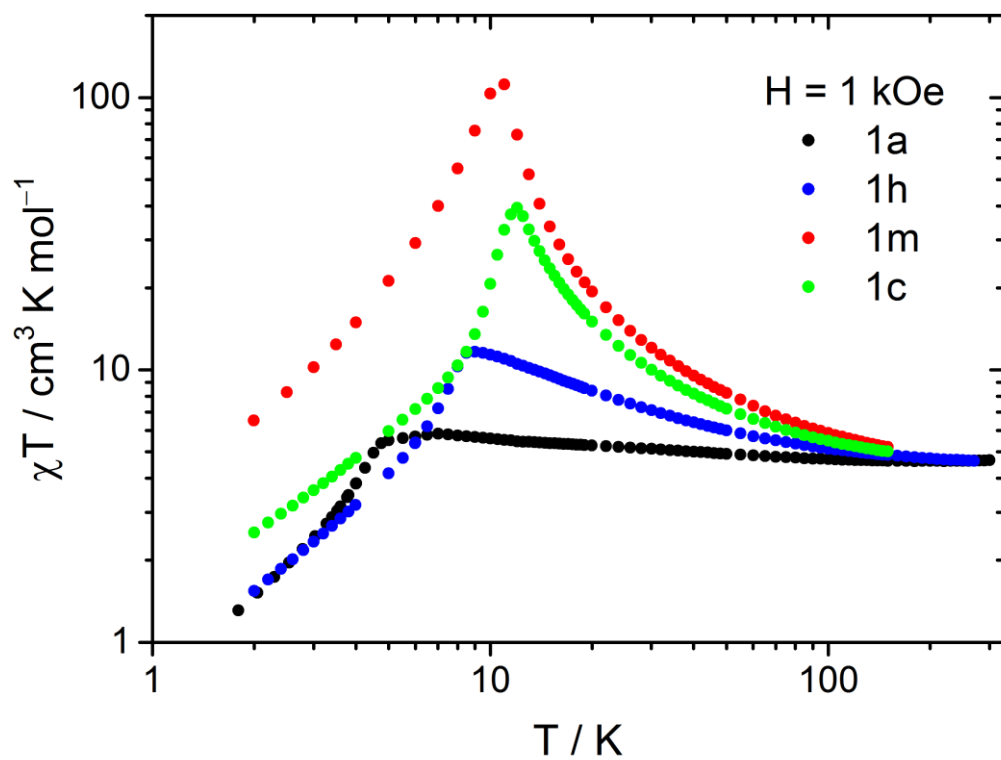

**Fig. S2.**  $\chi T$  vs.  $T$  for different pseudo-polymorphs of **1** (logarithmic scale).

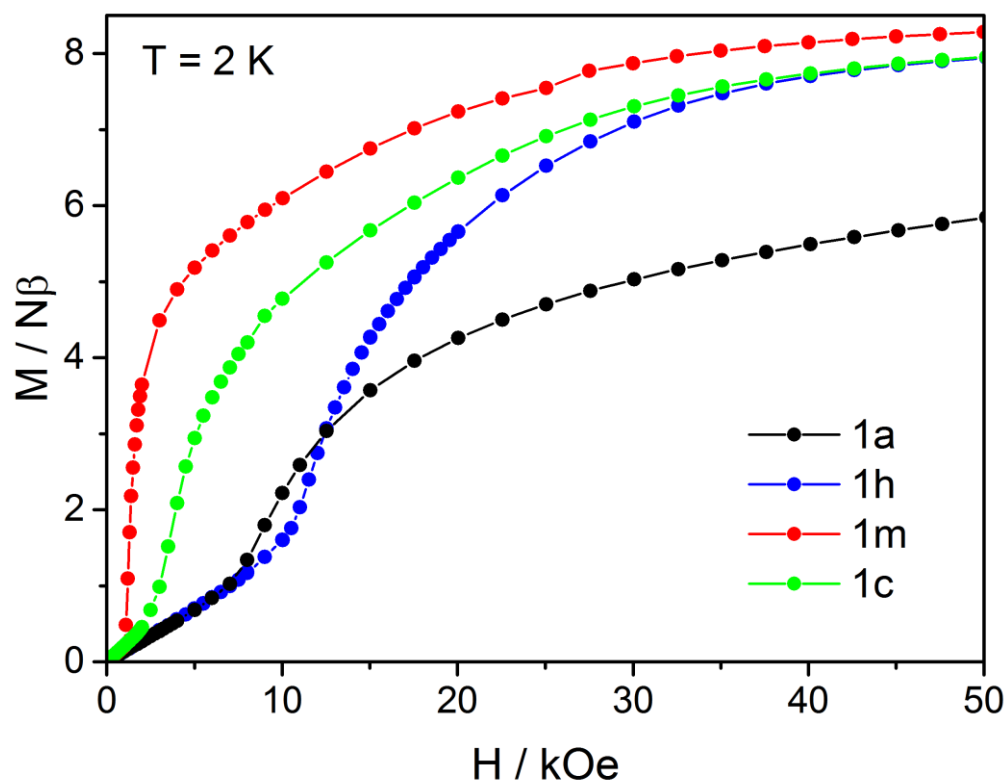

**Fig. S3.** Magnetization vs. field plot at 2K for different pseudo-polymorphs of **1**.
